# Supplementary material
Source: Springer Nature journal article supplement (https://www.springermedizin.de/resource/supplementary/12968_2008_479_MOESM3_ESM.pdf/9579172)
Supplement: MOESM3 [file 9579172]

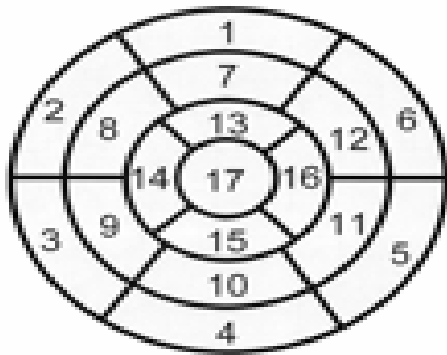

- |                        |                       |                     |
|------------------------|-----------------------|---------------------|
| 1. basal anterior      | 7. mid-anterior       | 13. apical anterior |
| 2. basal anteroseptal  | 8. mid-anteroseptal   | 14. apical septal   |
| 3. basal inferoseptal  | 9. mid-inferoseptal   | 15. apical inferior |
| 4. basal inferior      | 10. mid-inferior      | 16. lateral         |
| 5. basal inferolateral | 11. mid-inferolateral | 17. apex            |
| 6. basal anterolateral | 12. mid-anterolateral |                     |
